# Supplementary material for: Magnetic mesoporous silica/ε-polylysine nanomotor-based removers of blood Pb2+
Source: Royal Society of Chemistry journal article supplement (doi:10.1039/d0tb02270e), 2020-01-01
Supplement: d0tb02270e1.pdf [file d0tb02270e1.pdf]

## Supporting information

### Magnetic mesoporous silica/ $\epsilon$ -polylysine nanomotor-based removers of blood Pb<sup>2+</sup>

Zhiyong Liu,<sup>‡a</sup> Tingting Xu,<sup>‡a, b</sup> Meng Wang,<sup>a</sup> Chun Mao<sup>\*a</sup> and Bo Chi <sup>\*c</sup>

<sup>a</sup> National and Local Joint Engineering Research Center of Biomedical Functional Materials, Jiangsu Key Laboratory of Biofunctional Materials, School of Chemistry and Materials Science, Nanjing Normal University, Nanjing 210023, China

<sup>b</sup> Jiangsu Co-Innovation Center of Efficient Processing and Utilization of Forest Resources, College of Light Industry and Food Engineering, Nanjing Forestry University, Nanjing 210037, China

<sup>c</sup> State Key Laboratory of Materials-Oriented Chemical Engineering, College of Food Science and Light Industry, Nanjing Tech University, Nanjing 211816, China

### **Adsorption kinetics tested in aqueous condition**

For adsorption kinetics study, 10 mg of MMS/P NRs were added to 10 mL aqueous solutions with  $\text{Pb}^{2+}$  concentration of 100 ppm. The adsorption process was carried out in water bath device with a constant temperature of 37°C. The adsorbents were removed from the solution using a magnet at prescribed times (10 min, 30 min, 1 h, 2 h, 4 h, 8 h, 12 h, 16 h, 20 h, 24 h). The concentrations of the heavy metal ions were detected by ICP method.<sup>1</sup>

### **Activated partial thromboplastin time (APTT), prothrombin time (PT) and thrombin time (TT) test**

The platelet poor plasma (PPP) was obtained by centrifugation. Then 20 mg  $\text{mL}^{-1}$  of adsorbents were incubated in 1.5 mL PPP at 37°C for 1 h, followed by measuring the coagulation times including APTT, PT and TT with a Rayto-2204C Semi automated coagulometer (USA). All the tests were performed in triplicate.<sup>2</sup>

### **Complement activation**

MMS/P NRs were incubated with PPP obtained by centrifugation from whole blood at 37°C for 20 min. Then the cleavage of complement component C3 was monitored by detecting the formation of its activation peptides, C3a and C3a des-Arg, using a commercial C3a Elisa kit (BD OptEIA™) with a microplate reader (Biotek Synergy2, USA) according to the manufacturer's instructions.<sup>3</sup>

### **Adsorption isotherms tested in aqueous condition**

The adsorption isotherm study was carried out by exposing 10 mg of MMS/P NRs to 10 mL aqueous solutions with different initial ion concentrations ranging from 1 to 100 ppm for 24 h at 37°C, respectively. The adsorbents were also removed from the solution using a magnet. In order to determine the adsorbed amount of  $\text{Pb}^{2+}$ , the

concentrations of  $\text{Pb}^{2+}$  in the solution were detected before and after adsorption by using the ICP method.<sup>4</sup>

The adsorption data were dealt with the pseudo-first-order, the pseudo-second-order and the intraparticle diffusion models.<sup>5</sup>

The pseudo-first-order model was described as bellow:

$$\ln(q_e - q_t) = \ln q_e - k_1 t \quad (1)$$

the pseudo-second-order order model was shown as bellow:

$$\frac{t}{q_t} = \frac{1}{k_2 q_e^2} + \frac{t}{q_e} \quad (2)$$

and the intraparticle diffusion was shown as bellow:

$$q_t = k_{\text{diff}} \sqrt{t} + c \quad (3)$$

where  $q_t$  and  $q_e$  ( $\text{mmol g}^{-1}$ ) represented the amount of  $\text{Pb}^{2+}$  adsorbed on the adsorbents at time  $t$  (min) and equilibrium, respectively.  $k_1$ ,  $k_2$  and  $k_{\text{diff}}$  were the rate constants for each kinetic model.

Both Langmuir and Freundlich adsorption isotherms were obtained under  $25^\circ\text{C}$ .<sup>6</sup>

The Langmuir adsorption isotherms was described as bellow:

$$\frac{C_e}{q_e} = \frac{C_e}{q_{\text{max}}} + \frac{1}{K_L q_{\text{max}}} \quad (1)$$

and the Freundlich adsorption isotherms was shown as bellow:

$$\ln q_e = \ln K_F + \frac{1}{n} \ln C_e \quad (2)$$

where  $q_e$  and  $q_{\text{max}}$  represented the equilibrium and maximum  $\text{Pb}^{2+}$  adsorption ( $\text{mg g}^{-1}$ ),  $C_e$  meant the equilibrium  $\text{Pb}^{2+}$  concentration in solution ( $\text{mg L}^{-1}$ ),  $K_L$  was the Langmuir constant and increased with the affinity of sorbent for the sorbate.  $q_{\text{max}}$

represented the maximum adsorption capacity ( $\text{mg g}^{-1}$ ) of the sorbent.  $K_F$  and  $n$  represented constants and favorable adsorptions occur when  $n$  was greater than 1.

### **Hemolysis tests**

2% red blood cells (RBCs) suspension was added to MMS/P NRs which were weighed and immersed in saline water for 24 h.<sup>7</sup> Meanwhile, the RBCs were also incubated with PBS and twice-distilled water as negative control and positive control, respectively. After 1 h incubation, samples were centrifuged for 10 min at 1500 rpm. The optical density of the supernatant was measured at 545 nm. The percent hemolysis was calculated as follows.

$$\text{Percent hemolysis(\%)} = \left( \frac{\text{sample absorbance} - \text{negative control absorbance}}{\text{positive control absorbance} - \text{negative control absorbance}} \right) \times 100$$

The morphological changes of RBCs were observed and photographed with an Olympus E-620 camera (Olympus Ltd., Japan).<sup>8</sup>

### **Routine blood analytes**

The routine blood analytes were carried out before and after the blood was incubated with the MMS/P NRs.

### **Immune inflammatory system changes**

Interleukin-6 (il-6), tumor necrosis factor- $\alpha$  (TNF- $\alpha$ ) and C-reactive protein (crp) are nonspecific pro-inflammatory factors and sensitive markers of inflammatory reaction.<sup>9</sup> In this work, they were detected by Elisa kit (BD OptEIA™) with a microplate reader (Biotek Synergy2, USA) according to the manufacturer's instructions. Furthermore, in order to further study the peripheral blood lymphocyte

immunity, the proportion of CD3<sup>+</sup>CD4<sup>+</sup>/CD3<sup>+</sup>CD8<sup>+</sup> cells were calculated by flow cytometer (BD FACSCalibur, USA).<sup>10</sup>

### **The selective adsorption of haemoglobin(Hb) test**

Prepare 2 mg mL<sup>-1</sup> Hb solution with the Pb<sup>2+</sup> concentration of 1 ppm, and silent mix for 60 min. 10 mg mL<sup>-1</sup> MMP/NRs were used to adsorb clean Hb and Pb<sup>2+</sup>-contaminated Hb in a variable magnetic field for 30 min, then magnetically separate. The absorbance at 280 nm of the supernatant was measured.

### **Determination of optimal adsorption conditions**

We used different concentrations of MMS/P NRs to adsorb 0.6 ppm Pb<sup>2+</sup> solution and then determined the adsorption efficiency of Pb<sup>2+</sup>, detected the adsorption efficiency of different origin concentration of Pb<sup>2+</sup> solution with 10 mg mL<sup>-1</sup> MMS/P NRs, and tested the adsorption efficiency of 10 mg mL<sup>-1</sup> MMS/P NRs for 0.6 ppm Pb<sup>2+</sup> solution at different times to obtain the best experimental conditions.

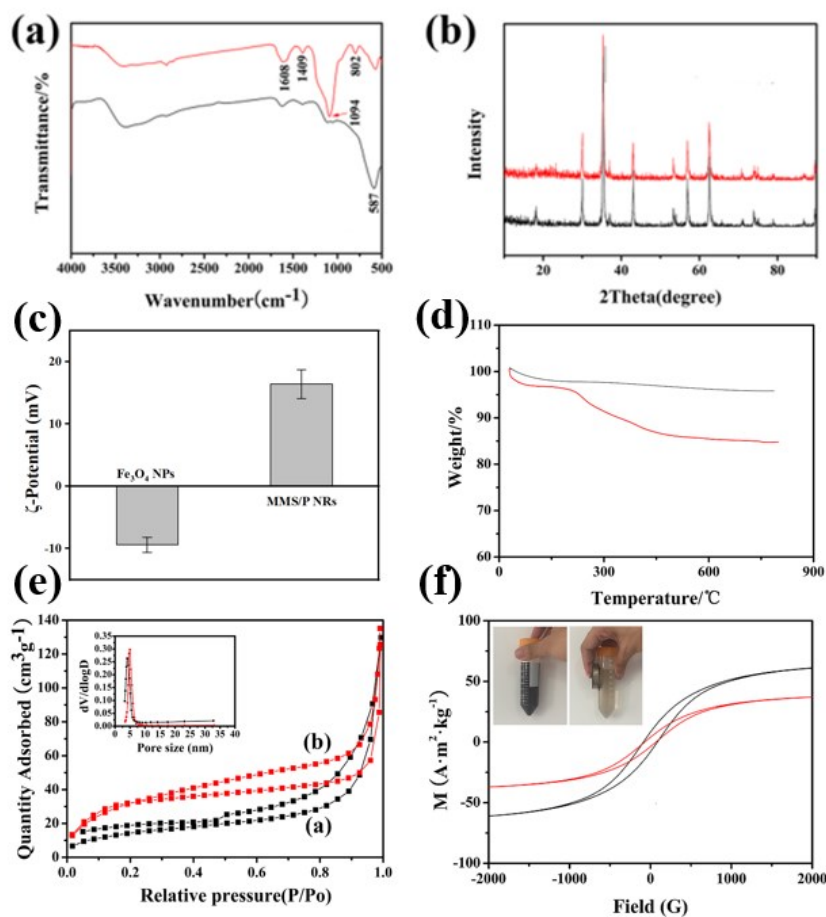

**Fig. S1.** (a) FT-IR spectra of  $\text{Fe}_3\text{O}_4$  and MMS/P NRs; (b) the XRD spectra of  $\text{Fe}_3\text{O}_4$  and MMS/P NRs; (c)  $\zeta$ -potential of  $\text{Fe}_3\text{O}_4$  NPs and MMS/P NRs; (d) TGA profiles of  $\text{Fe}_3\text{O}_4$  (black) and MMS/P NRs (red); (e) nitrogen adsorption-desorption isotherms and pore size distribution (inset) of MMS/P NRs before (black) and after (red) removal of the template, and (f) the hysteresis loops of  $\text{Fe}_3\text{O}_4$  NPs (black) and MMS/P NRs (red).

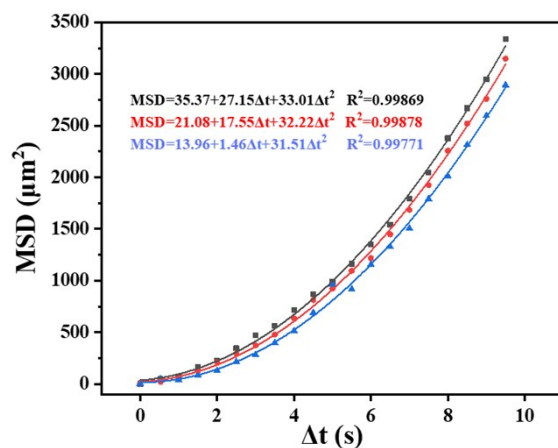

**Fig. S2.** The mean square displacement of MMS/P NRs in aqueous solution.

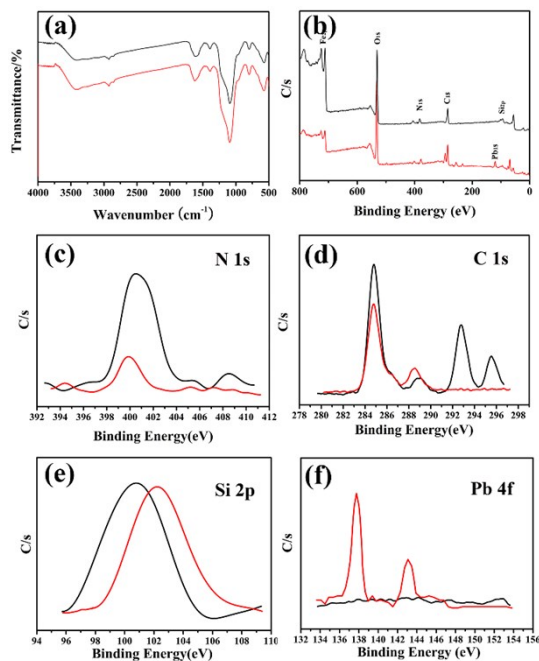

**Fig. S3.** (a) FT-IR spectra of the MMS/P NRs before (black) and after (red) adsorption; (b) the XPS images of the MMS/P NRs before (black) and after (red) Pb<sup>2+</sup> adsorption process (water phase); and the partial enlarged XPS images of (c) N1s, (d) C1s, (e) Si 2p and (f) Pb 4f of the MMS/P NRs before (black) and after (red) Pb<sup>2+</sup> adsorption process (water phase).

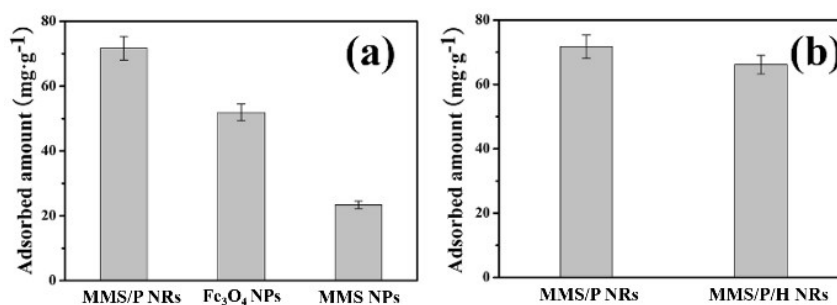

**Fig. S4.** Adsorption performance of Pb<sup>2+</sup> on (a) different samples and (b) before (MMS/P NRs) and after (MMS/P/H NRs) modification of heparin.

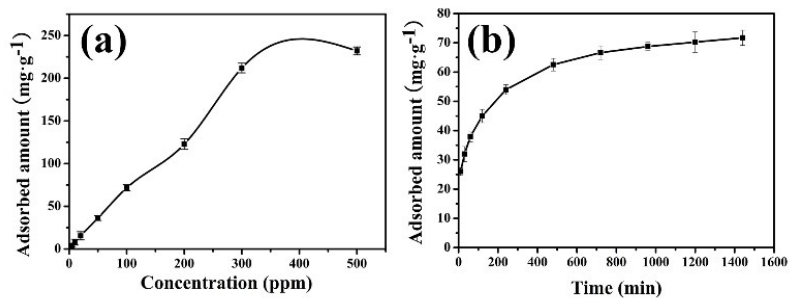

**Fig. S5.** (a) Adsorption performance of Pb<sup>2+</sup> by MMS/P NRs under different concentration of Pb<sup>2+</sup> (adsorption time was 24 h); (b) adsorption performance for different time (adsorption concentration was 100 ppm).

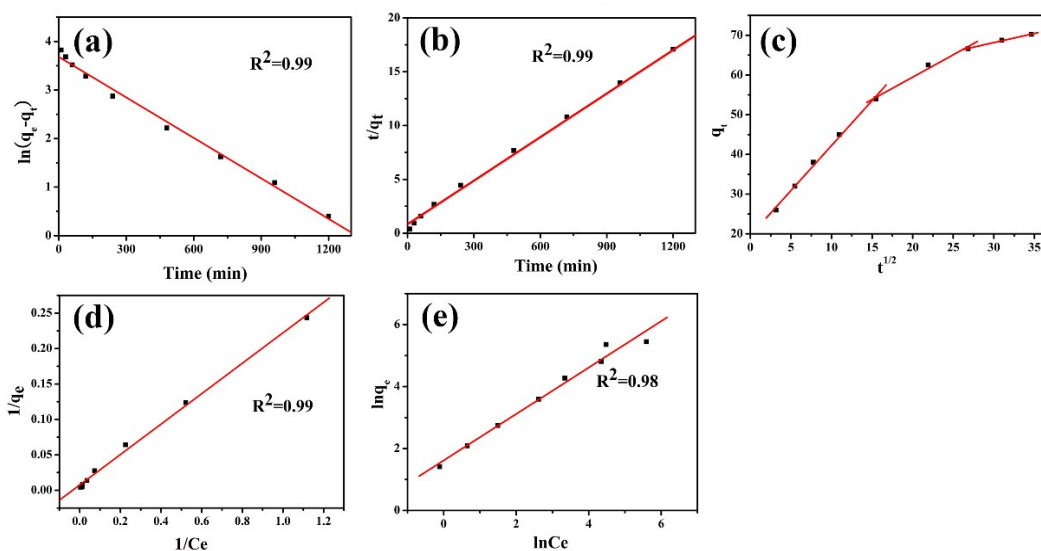

**Fig. S6.** (a) Pseudo-first-order kinetic model plots, (b) pseudo-second-order kinetic model plots and (c) intraparticle diffusion kinetics for the adsorption of Pb<sup>2+</sup> on the MMS/P NRs; (d) Langmuir and (e) Freundlich adsorption isotherms for the adsorption of Pb<sup>2+</sup> on the MMS/P NRs.



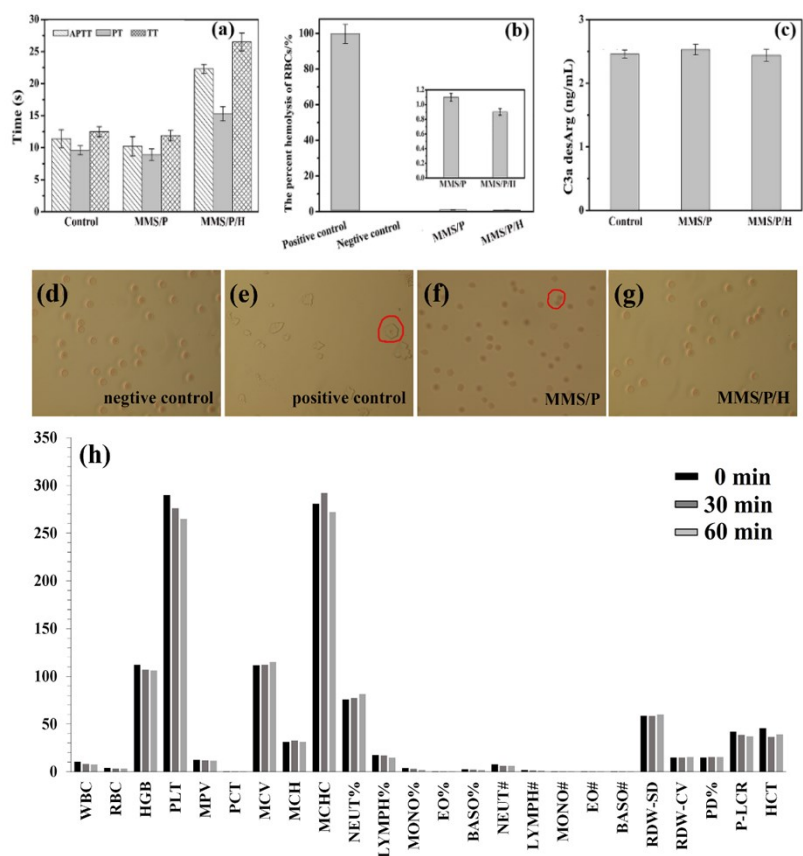

**Fig. S7.** (a) APTT/PT/TT values, (b) the hemolysis ratio and (c) the concentration of C3a desArg of MMS/P NRs before and after soaking in heparin solution; optical images of RBCs treated by (d) negative control, (e) positive control (f) MMS/P NRs and (g) MMS/P/H NRs; (h) the routine blood results of the MMS/P NRs.

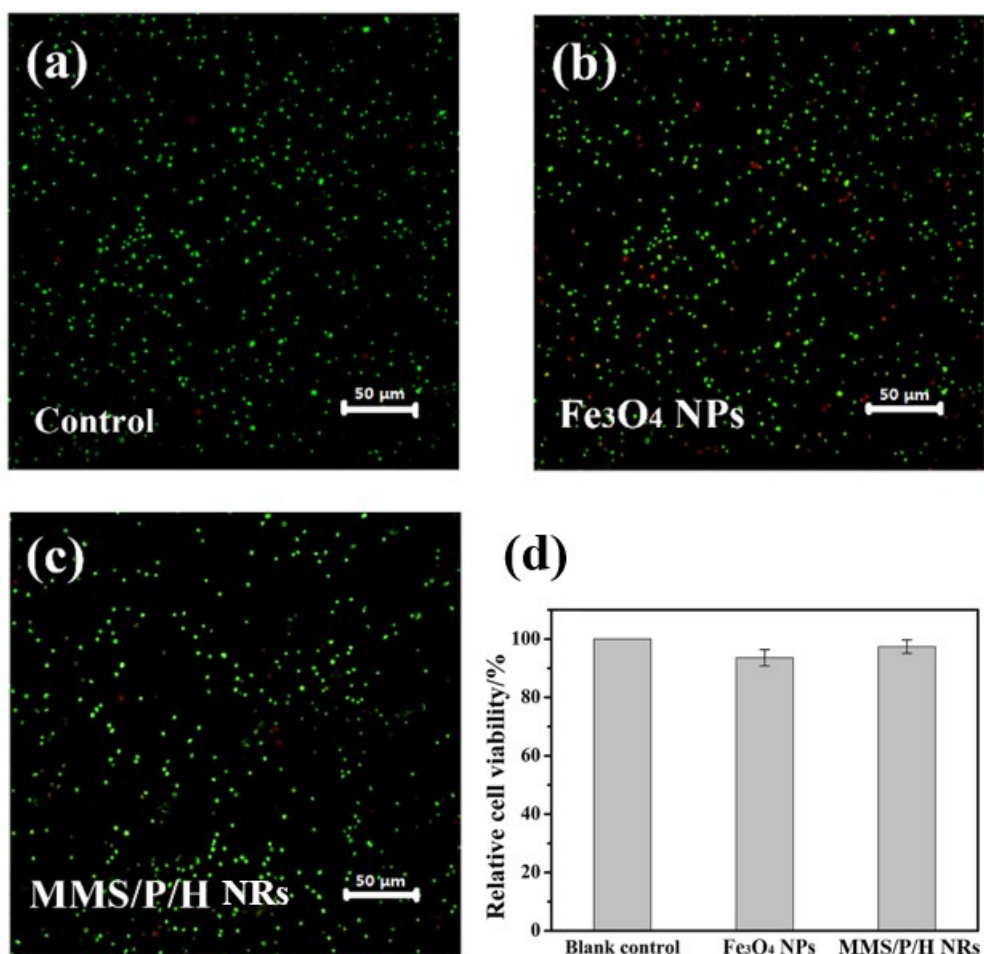

**Fig. S8.** Fluorescence confocal images of inside peripheral blood lymphocyte before (a) and after being incubated with (b) Fe<sub>3</sub>O<sub>4</sub> NPs and (c) the MMS/P/H NRs; (d) cell viability of peripheral blood lymphocyte before and after being incubated with Fe<sub>3</sub>O<sub>4</sub> and the MMS/P/H NRs.

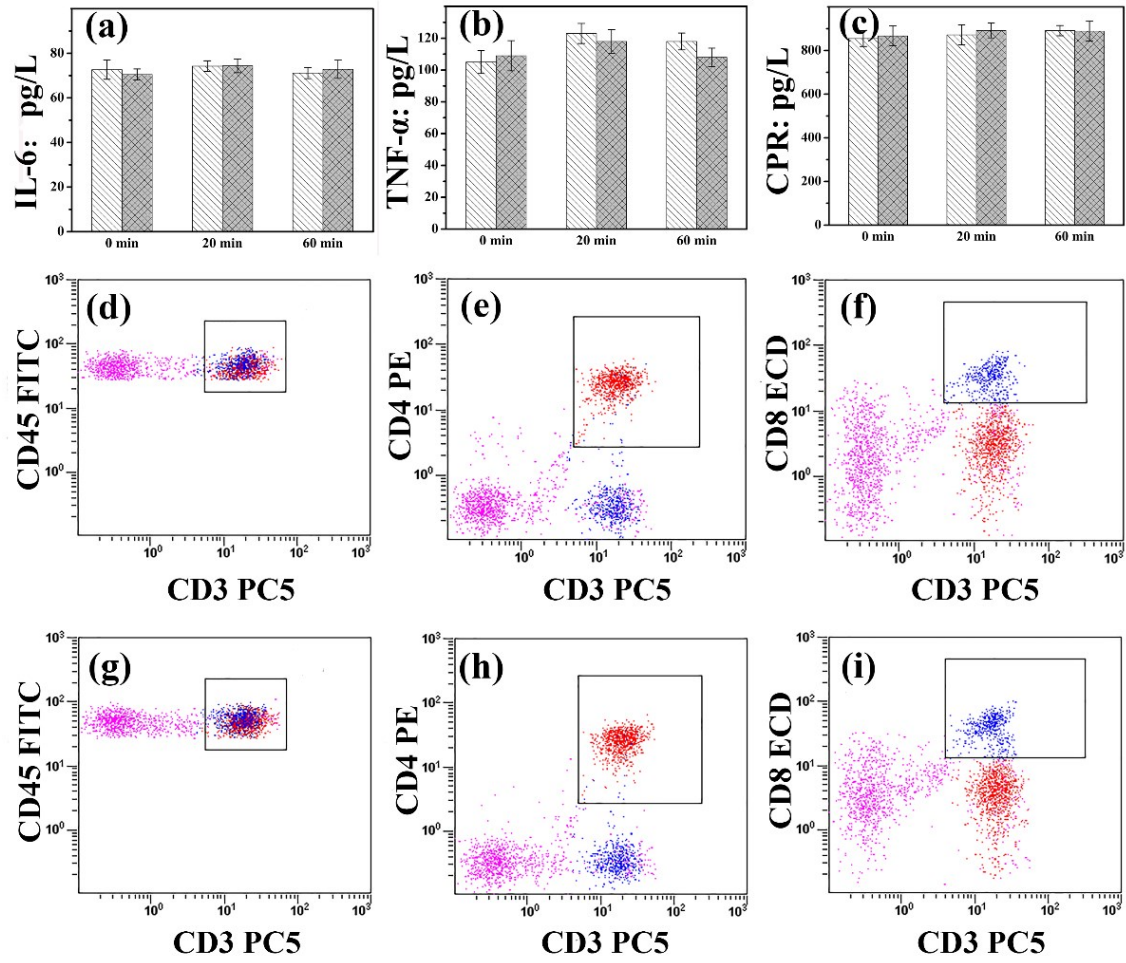

**Fig. S9.** The inflammatory factor (a) IL-6, (b) TNF- $\alpha$  and (c) CRP levels before and after adsorption for different times; effect on cellular immunity and inflammation before and after adsorption by MMS/P/H NRs: (d, e, f) displayed the cellular antigen expression levels of CD3<sup>+</sup> CD45<sup>+</sup>, CD3<sup>+</sup> CD4<sup>+</sup>, CD3<sup>+</sup> CD8<sup>+</sup> before adsorption, while (g, h, i) showed those levels after adsorption.

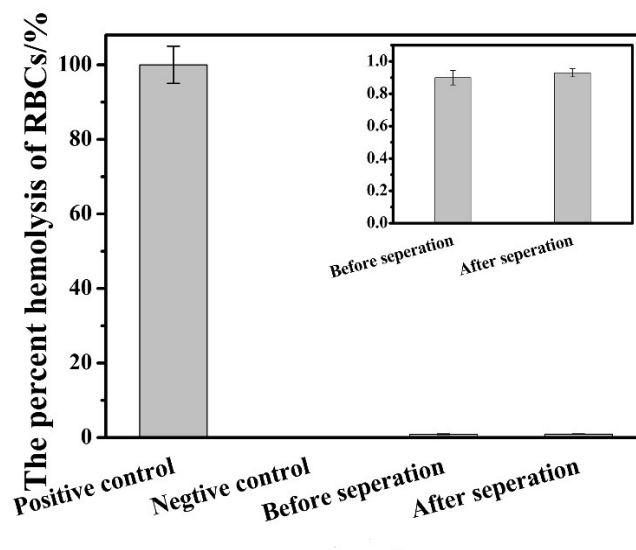

**Fig. S10.** The hemolysis ratio of RBCs before and after MMS/P/H NPs being magnetic separation.

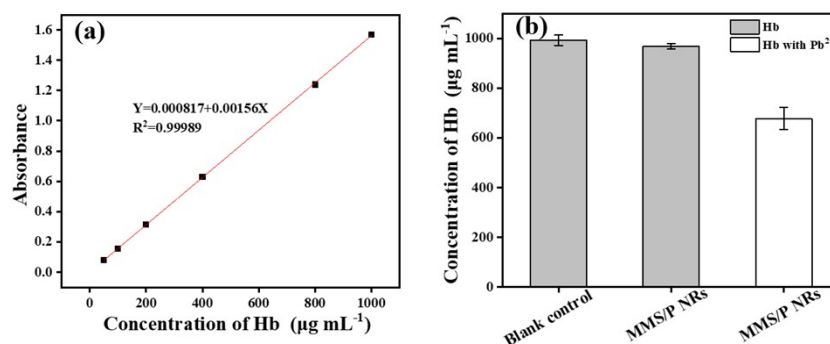

**Fig. S11.** (a) Standard concentration curve of Hb. (b) MMS/P NRs selectively adsorb Hb contaminated with  $\text{Pb}^{2+}$ .

**Table S1.** Summary of current research of the blood Pb<sup>2+</sup> absorbent

| Materials                                              | Autonomous movement | Adsorption environment | Adsorption mechanism                                                                                                                                                                                                 | Ref. |
|--------------------------------------------------------|---------------------|------------------------|----------------------------------------------------------------------------------------------------------------------------------------------------------------------------------------------------------------------|------|
| Pb <sup>2+</sup> -bound 1                              | ×                   | Blood                  | Magnetic nanomaterials were coated with fluorescent receptors to detect and remove Pb <sup>2+</sup>                                                                                                                  | 11   |
| Fe <sub>3</sub> C-(PEI-DTPA) <sub>n</sub>              | ×                   | Blood                  | Heavy-metal binding EDTA-like Chelators modified magnetic nanoparticles for the adsorption and separation of Pb <sup>2+</sup>                                                                                        | 12   |
| C/Fe <sub>3</sub> C-PEI-IDA                            | ×                   | Blood                  | Nanomagnets coated with poly(ethylene imine) -iminodiacetic acid were used for specific adsorption of Pb <sup>2+</sup> and separated from blood                                                                      | 13   |
| SH-SBA-15                                              | ×                   | Blood and bile         | MPTMS ((3-mercaptopro-Pyl) trimethoxysilane) Thiol-groups were used to modify mesoporous silica, and Pb <sup>2+</sup> are absorbed by -SH on the surface of material                                                 | 14   |
| Fe <sub>3</sub> O <sub>4</sub> @SiO <sub>2</sub> @DMSA | ×                   | Blood and urine        | Fe <sub>3</sub> O <sub>4</sub> @SiO <sub>2</sub> modified with the Meso-2,3-Dimercaptosuccinic acid and -SH was used to capture Pb <sup>2+</sup> in blood and urine                                                  | 15   |
| MNP@DMSA                                               | ×                   | Blood, RBCs and plasma | Magnetic nano capture agent coated with the Meso-2, 3-Dimercaptosuccinic acid, and -SH was used to capture Pb <sup>2+</sup>                                                                                          | 16   |
| Fe <sub>3</sub> O <sub>4</sub> @ Au@DNA                | ×                   | Blood                  | Core-shell structured magnetic microspheres functionalized with the Pb <sup>2+</sup> -binding aptamer as adsorbent, isolate and detect trace Pb <sup>2+</sup>                                                        | 17   |
| CaCO <sub>3</sub> NDs                                  | ×                   | Blood                  | Construct “cyborg erythrocytes” through the in situ reaction of exogenous calcium and carbonate ions to generate calcium carbonate nanodots inside erythrocytes can remove Pb <sup>2+</sup> in blood poisoning model | 18   |
| Bac@Ceria                                              | √                   | Blood and organs       | Non-pathogenic bacteria are decorated with cerium oxide nanoparticles and adsorb excessive Pb <sup>2+</sup> in blood and organs                                                                                      | 19   |
| MMS/H                                                  | ×                   | Blood and RBCs         | Hemoglobin containing Pb <sup>2+</sup> is selectively captured by hyperbranched poly(amidoamine)s, and magnetic separate from blood                                                                                  | 20   |
| SrTiO <sub>3</sub> NPs                                 | ×                   | Blood and urine        | Pb <sup>2+</sup> in water-soluble medium was enriched by physical adsorption of strontium titanate nanoparticles (SrTiO <sub>3</sub> )                                                                               | 21   |

|           |   |                |                                                                                                                                                                                                                   |           |
|-----------|---|----------------|-------------------------------------------------------------------------------------------------------------------------------------------------------------------------------------------------------------------|-----------|
| MMS/P NRs | √ | Blood and RBCs | MMS/P NRs move autonomously under the guidance of magnetic field, capturing many Pb <sup>2+</sup> -contaminated hemoglobin and fixing it in the mesoporous area, which was separated from blood by magnetic field | This work |
|-----------|---|----------------|-------------------------------------------------------------------------------------------------------------------------------------------------------------------------------------------------------------------|-----------|

**Table S2.** Specific surface, pore diameter and pore volume of MMS/P NRs and MMS NPs.

| Sample    | Specific surface area (m <sup>2</sup> g <sup>-1</sup> ) | Pore diameter (nm) | Pore volume (cm <sup>3</sup> g <sup>-1</sup> ) |
|-----------|---------------------------------------------------------|--------------------|------------------------------------------------|
| MMS/P NRs | 118.56                                                  | 9.4                | 0.108                                          |
| MMS NPs   | 303.34                                                  | 10.8               | 0.306                                          |

**Table S3.** Pseudo-first order, pseudo-second order and intraparticle diffusion kinetic model parameters.

| Heavy metal ions | Pseudo-first-order kinetic |                | Pseudo-second-order kinetic |                | Intraparticle diffusion kinetic |                   |
|------------------|----------------------------|----------------|-----------------------------|----------------|---------------------------------|-------------------|
|                  | K <sub>1</sub>             | R <sub>1</sub> | K <sub>2</sub>              | R <sub>2</sub> | K <sub>diff</sub>               | R <sub>diff</sub> |
| Pb <sup>2+</sup> |                            |                |                             |                | 2.27                            | 0.99              |
|                  | 2.8*10 <sup>-3</sup>       | 0.99           | 2.5*10 <sup>-4</sup>        | 0.99           | 1.13                            | 0.98              |
|                  |                            |                |                             |                | 0.46                            | 0.99              |

**Table S4.** Langmuir and Freundlich adsorption isothermal constants, correlation coefficients.

| Heavy metal ions | Langmuir         |                |                |      | Freundlich     |                |
|------------------|------------------|----------------|----------------|------|----------------|----------------|
|                  | q <sub>max</sub> | K <sub>L</sub> | R <sup>2</sup> | n    | K <sub>F</sub> | R <sup>2</sup> |
| Pb <sup>2+</sup> | 131.58           | 0.0354         | 0.99           | 1.34 | 5.04           | 0.98           |

**Table S5.** The efficiency of Pb<sup>2+</sup> adsorption in the aqueous condition.

| adsorbent/m<br>g·mL <sup>-1</sup> | adsorption<br>efficiency/% | adsorption<br>time/min | adsorption<br>efficiency/% | Pb <sup>2+</sup> /ppm | adsorption<br>efficiency/% |
|-----------------------------------|----------------------------|------------------------|----------------------------|-----------------------|----------------------------|
| 1                                 | 31.72                      | 10                     | 26.61                      | 0.6                   | 65.87                      |
| 2                                 | 43.98                      | 30                     | 65.87                      | 1                     | 63.35                      |
| 5                                 | 57.39                      | 45                     | 66.57                      | 2                     | 43.04                      |
| 10                                | 65.87                      | 60                     | 66.38                      | 5                     | 34.19                      |
| 20                                | 68.87                      | 90                     | 67.29                      | 10                    | 33.46                      |
| 50                                | 70.26                      | \                      | \                          | \                     | \                          |

**Table S6.** The bond length and bond dissociation energy of Pb<sup>2+</sup> bound with ε-PL.

|                                                           | Pb-N14 | Pb-N3  | Pb-O2  | N3-Pb-N14 | N14-Pb-O2 |
|-----------------------------------------------------------|--------|--------|--------|-----------|-----------|
|                                                           |        |        |        | N3-Pb     | O2-Pb     |
|                                                           |        |        |        | 2.45      | 2.20      |
| <b>Bond length (Å)</b>                                    | 2.35   | 2.48   | 2.07   | N14-Pb    | N14-Pb    |
|                                                           |        |        |        | 2.41      | 2.41      |
| <b>Bond dissociation<br/>energy (kJ mol<sup>-1</sup>)</b> | 149.05 | 132.65 | 157.03 | 203.03    | 156.16    |

**Table S7.** Comparison of HOMO-LUMO transition energies between Pb<sup>2+</sup> and ε-PL.

|           | HOMO(Hartree) | LUMO(Hartree) | E <sub>gap</sub> (Hartree) |
|-----------|---------------|---------------|----------------------------|
| Pb-N14    | -0.28462      | -0.14491      | 0.13971                    |
| Pb-N3     | -0.27543      | -0.15518      | 0.12025                    |
| Pb-O2     | -0.27414      | -0.13345      | 0.14069                    |
| N3-Pb-N14 | -0.32621      | -0.1058       | 0.22041                    |
| N14-Pb-O2 | -0.29938      | -0.1112       | 0.18818                    |

## Reference

- (1) S. M. Ponder, J. G. Darab and T. E. Mallouk, *Environ. Sci. Technol.*, 2000, **34**, 2564-2569.
- (2) H. Chen, M. F. Neerman, A. R. Parrish and E. E. Simanek, *J. Am. Chem. Soc.*, 2004, **126**, 10044-10048.
- (3) M. M. Wan, Y. Y. Li, T. Yang, T. Zhang, X. D. Sun and J. H. Zhu, *Chem. Eur. J.*, 2016, **22**, 6294-6301.
- (4) G. Zhao, J. Li, X. Ren, C. Chen and X. Wang, *Environ. Sci. Technol.*, 2011, **45**, 10454-10462.
- (5) H. Lu, W. Zhang, Y. Yang, X. Huang, S. Wang and R. Qiu, *Water Res.*, 2012, **46**, 854-862.
- (6) S. Y. Liu, J. Gao, Y. J. Yang, Y. C. Yang and Z. X. Ye, *J. Hazard. Mater.*, 2010, **173**, 558-562.
- (7) R. K. Kainthan, J. Janzen, E. Levin, D. V. Devine and D. E. Brooks, *Biomacromolecules*, 2006, **7**, 703-709.
- (8) F. Peng, H. Li, D. Wang, P. Tian, Y. Tian,; G. Yuan, D. Xu and X. Liu, *ACS Appl. Mater. Interfaces*, 2016, **8**, 35033-35044.
- (9) V. Panichi, M. Migliori, S. De Pietro, D. Taccola, B. Andreini, M. R. Metelli, L. Giovannini and R. Palla, *Kidney Int.*, 2000, **76**, S96-103.
- (10) A. Naji, S. Le Rond, A. Durrbach, I. Krawice-Radanne, C. Creput, M. Daouya, J. Caumartin, J. LeMaoult, E. D. Carosella and N. Rouas-Freiss, *Blood*, 2007, **110**, 3936-3948.
- (11) H. Y. Lee, D. R. Bae, J. C. Park, H. Song, W. S. Han and J. H. Jung, *Angew. Chem.*



*Int. Ed.*, 2009, **48**, 1239-1243.

(12) I. K. Herrmann, M. Urner, F. M. Koehler, M. Hasler, B. Roth-Z'graggen, R. N. Grass, U. Ziegler and B. Beck-Schimmer, W. J. Stark, *Small*, 2010, **6**, 1388-1392.

(13) I. K. Herrmann, A. Schlegel, R. Graf, C. M. Schumacher, N. Senn, M. Hasler, S. Gschwind, A. M. Hirt, D. Gunther, P. A. Clavien, W. J. Stark and B. Beck-Schimmer, *Nanoscale*, 2013, **5**, 8718-8723.

(14) W. Huang, P. Zhang, H. Xu, S. Chang, Y. He, F. Wang and G. Liang, *Nanotechnology*, 2015, **26**, 385101.

(15) Y. Xiang, Z. Bai, S. Zhang, Y. Sun, S. Wang, X. Wei, W. Mo, J. Long, Z. Liu, C. Yang, L. Zheng, X. Guo, W. Xiaoyang, F. Mao and N. Feng, *Nanomed.-Nanotechnol.*, 2017, **13**, 1341-1351.

(16) X. Guo, W. Wang, X. Yuan, Y. Yang, Q. Tian, Y. Xiang, Y. Sun and Z. Bai, *J. Colloid Interf. Sci.*, 2019, **536**, 563-574.

(17) Y. K. Li, W. T. Li, X. Liu, T. Yang, M. L. Chen and J. H. Wang, *Talanta*, 2019, **203**, 210-219.

(18) X. Ru, Y. Guo, Z. Bai, X. Xie, X. Ma, L. Zhu, K. Wang, F. Wang, L. Yang and J. Lu, *Commun. Chem.*, 2019, **2**, 105.

(19) P. Pan, J. X. Fan, X. N. Wang, J. W. Wang, D. W. Zheng, H. Cheng and X. Z. Zhang, *Adv. Sci.*, 2019, **6**, 1902500.

(20) M. M. Wan, T. T. Xu, B. Chi, M. Wang, Y. Huang, Q. Wang, T. Li, W. Q. Yan, H. Chen, P. Xu, C. Mao, B. Zhao, J. Shen, H. Xu and D. Q. Shi, *Angew. Chem. Int. Ed.*, 2019, **58**, 10582-10586.

(21) W. I. Mortada and A. M. Abdelghany, *Biol. Trace Elem. Res.*, 2020, **193**, 100-110.
